# Supplementary material for: Chronic environmental temperature affects protein expression in the eye of adult zebrafish (Danio rerio)
Source: Springer Nature journal article supplement (doi:10.1038/s41598-025-29745-1), 2025-11-29
Supplement: MOESM1 [file Supplementary Figures_171125.pdf › Supplementary Figures_171125.pdf]

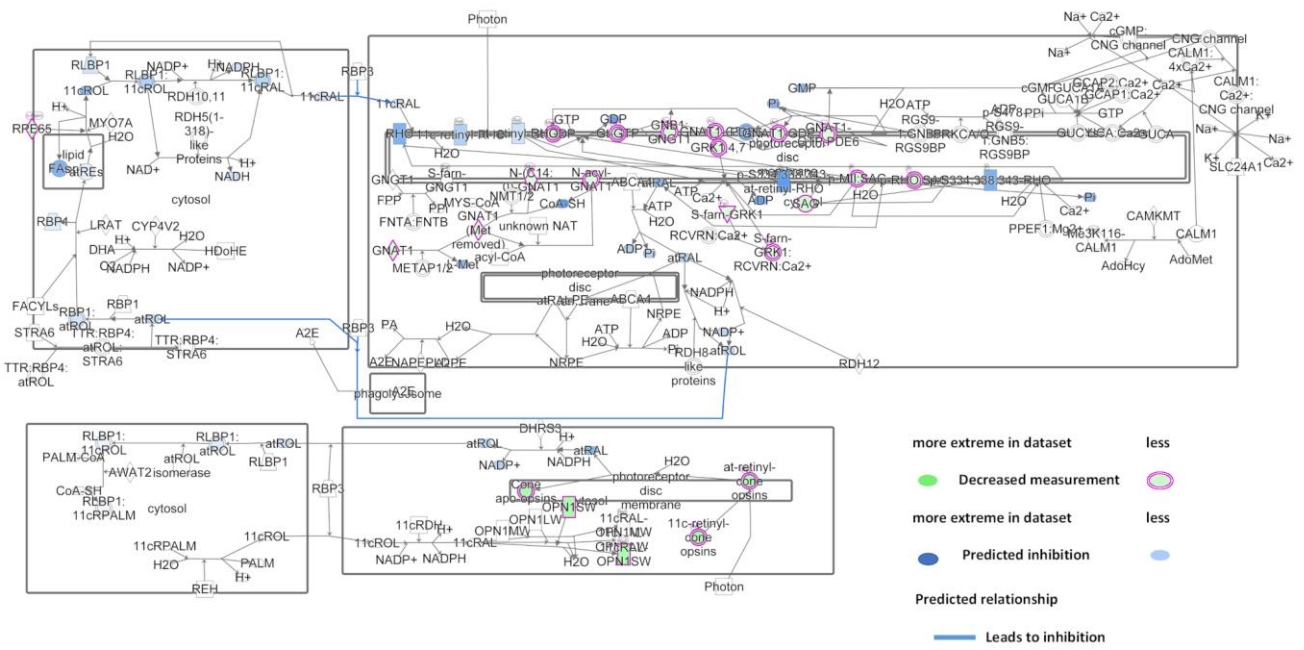

**Figure S1. Schematic representation of the phototransduction pathway in rod and cone cells.** The scheme, generated using IPA, highlights proteins involved in the phototransduction pathways that were found to be downregulated in the 34 °C vs 26 °C comparison. These proteins are indicated in green. The legend provides details on all other symbols.

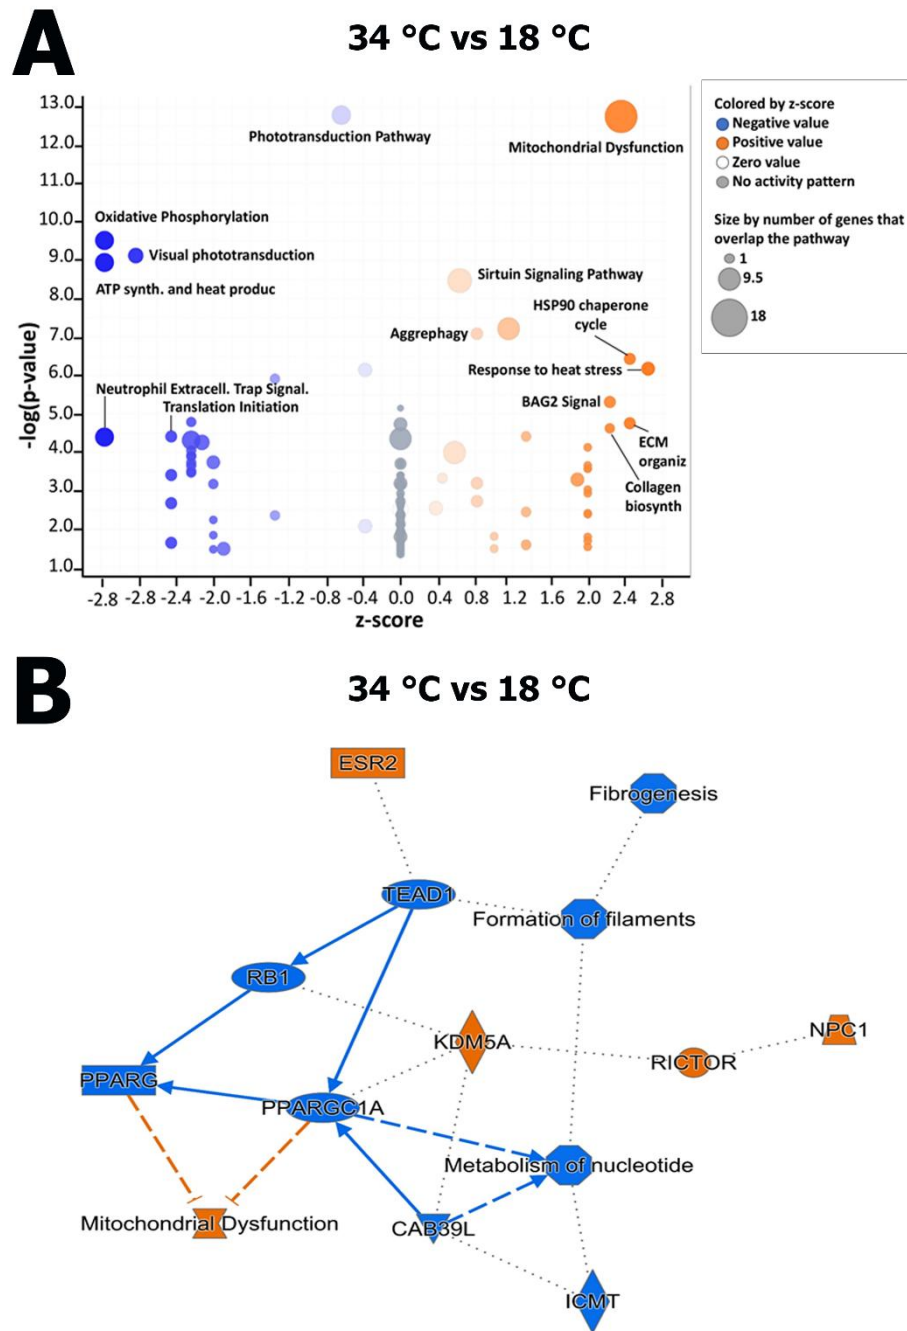

**Figure S2. Bioinformatic analysis using IPA of differentially expressed proteins at 34 °C compared to 18 °C.** **A)** Proteins differentially expressed in the 34 °C vs 18 °C comparison were analyzed using IPA to identify the most significantly altered canonical pathways. Proteins were considered differentially expressed if they were either uniquely present in one condition or exhibited a significant difference in expression (Student's test  $FDR \leq 0.05$ ). For clarity, only a subset of pathways with significant Z-scores are labelled in the Volcano plot. The Z score indicates the activation or inhibition state of a canonical pathway: Z-scores  $\geq 2$  or  $\leq -2$  are considered significant, with positive scores (orange) indicating activation and negative scores (blue) indicating inhibition. The legend provides details on symbol colours and sizes. **B) Graphical summary.** A high-level overview of the major biological themes and the most significant entities predicted by IPA analysis for differentially expressed proteins in the 34 °C vs 18 °C comparison.

## 34 °C vs 26 °C

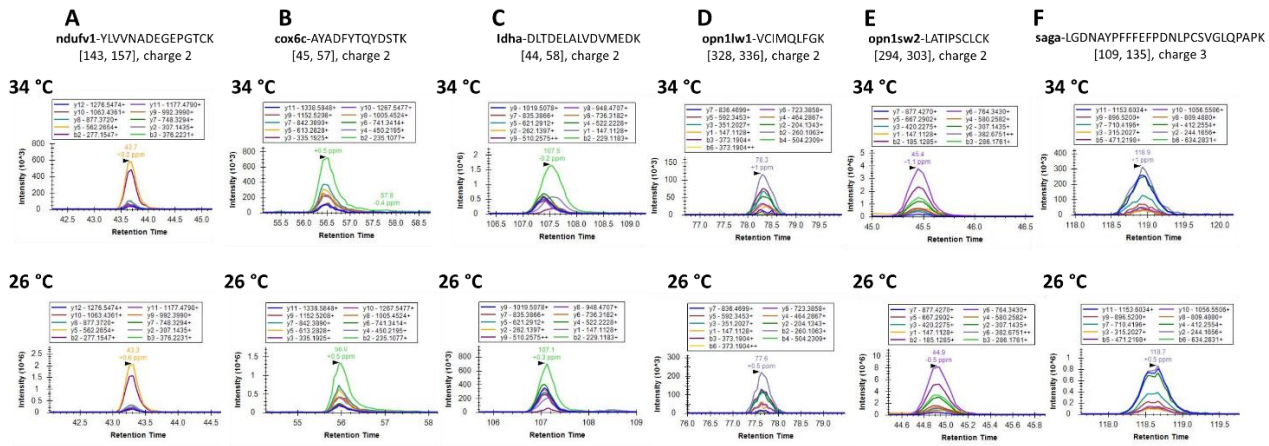

**Figure S3. Parallel reaction monitoring (PRM) assay for detection of NADH dehydrogenase [ubiquinone] flavoprotein 1 (ndufv1), Cytochrome c oxidase subunit 6C (cox6c), L-lactate dehydrogenase A chain (Idha), Long-wavelength-sensitive-1 cone opsin (opn1lw1), Opsin 1 (Cone pigments), short-wave-sensitive 2 (opn1sw2), and S-arrestin (saga) in the 34 °C vs 26 °C comparison.** Extracted-ion chromatogram (XIC) of the transitions observed for the peptide: A) 143-YLVVNADEGEPTGK-157 from NADH dehydrogenase [ubiquinone] flavoprotein 1 (ndufv1); B) 45-AYADFYTQYDSTK-57 from Cytochrome c oxidase subunit 6C (cox6c); C) 44-DLTDELALVDVMDK-58 from L-lactate dehydrogenase A chain (Idha); D) 328-VcIMQLFGK-336 from Long-wavelength-sensitive-1 cone opsin (opn1lw1); E) 294-LATIPScLcK-303 from Opsin 1 (Cone pigments), short-wave-sensitive 2 (opn1sw2) and F) 109-LGDNAYPFFFEFDNLPcSVGLQPAPK-135 from S-arrestin (saga).

## 34 °C vs 18 °C

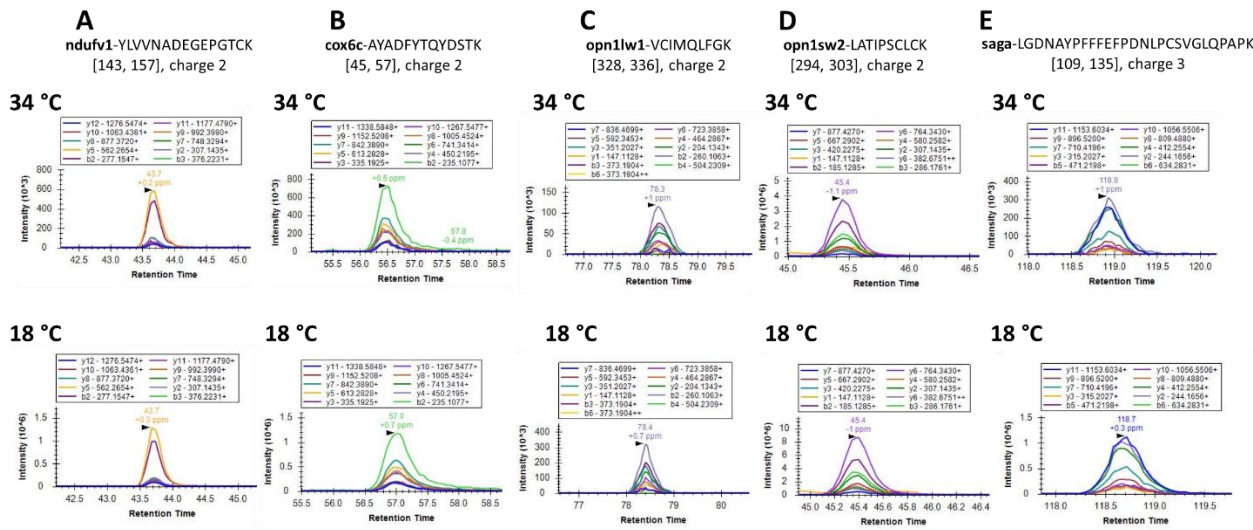

**Figure S4. Parallel reaction monitoring (PRM) assay for detection of NADH dehydrogenase [ubiquinone] flavoprotein 1 (ndufv1), Cytochrome c oxidase subunit 6C (cox6c), Long-wavelength-sensitive-1 cone opsin (opn1lw1), Opsin 1 (Cone pigments), short-wave-sensitive 2 (opn1sw2), and S-arrestin (saga) in the 34 °C vs 18 °C comparison.** Extracted-ion chromatogram (XIC) of the transitions observed for the peptide: A) 143-YLVVNADEGEPTCK-157 from NADH dehydrogenase [ubiquinone] flavoprotein 1 (ndufv1); B) 45-AYADFYTQYDSTK-57 from Cytochrome c oxidase subunit 6C (cox6c); C) 328-VcIMQLFGK-336 from Long-wavelength-sensitive-1 cone opsin (opn1lw1); D) 294-LATIPScLcK-303 from Opsin 1 (Cone pigments), short-wave-sensitive 2 (opn1sw2) and E) 109-LGDNAYPFFFEFPDNLPCSVGLQPAPK-135 from S-arrestin (saga).

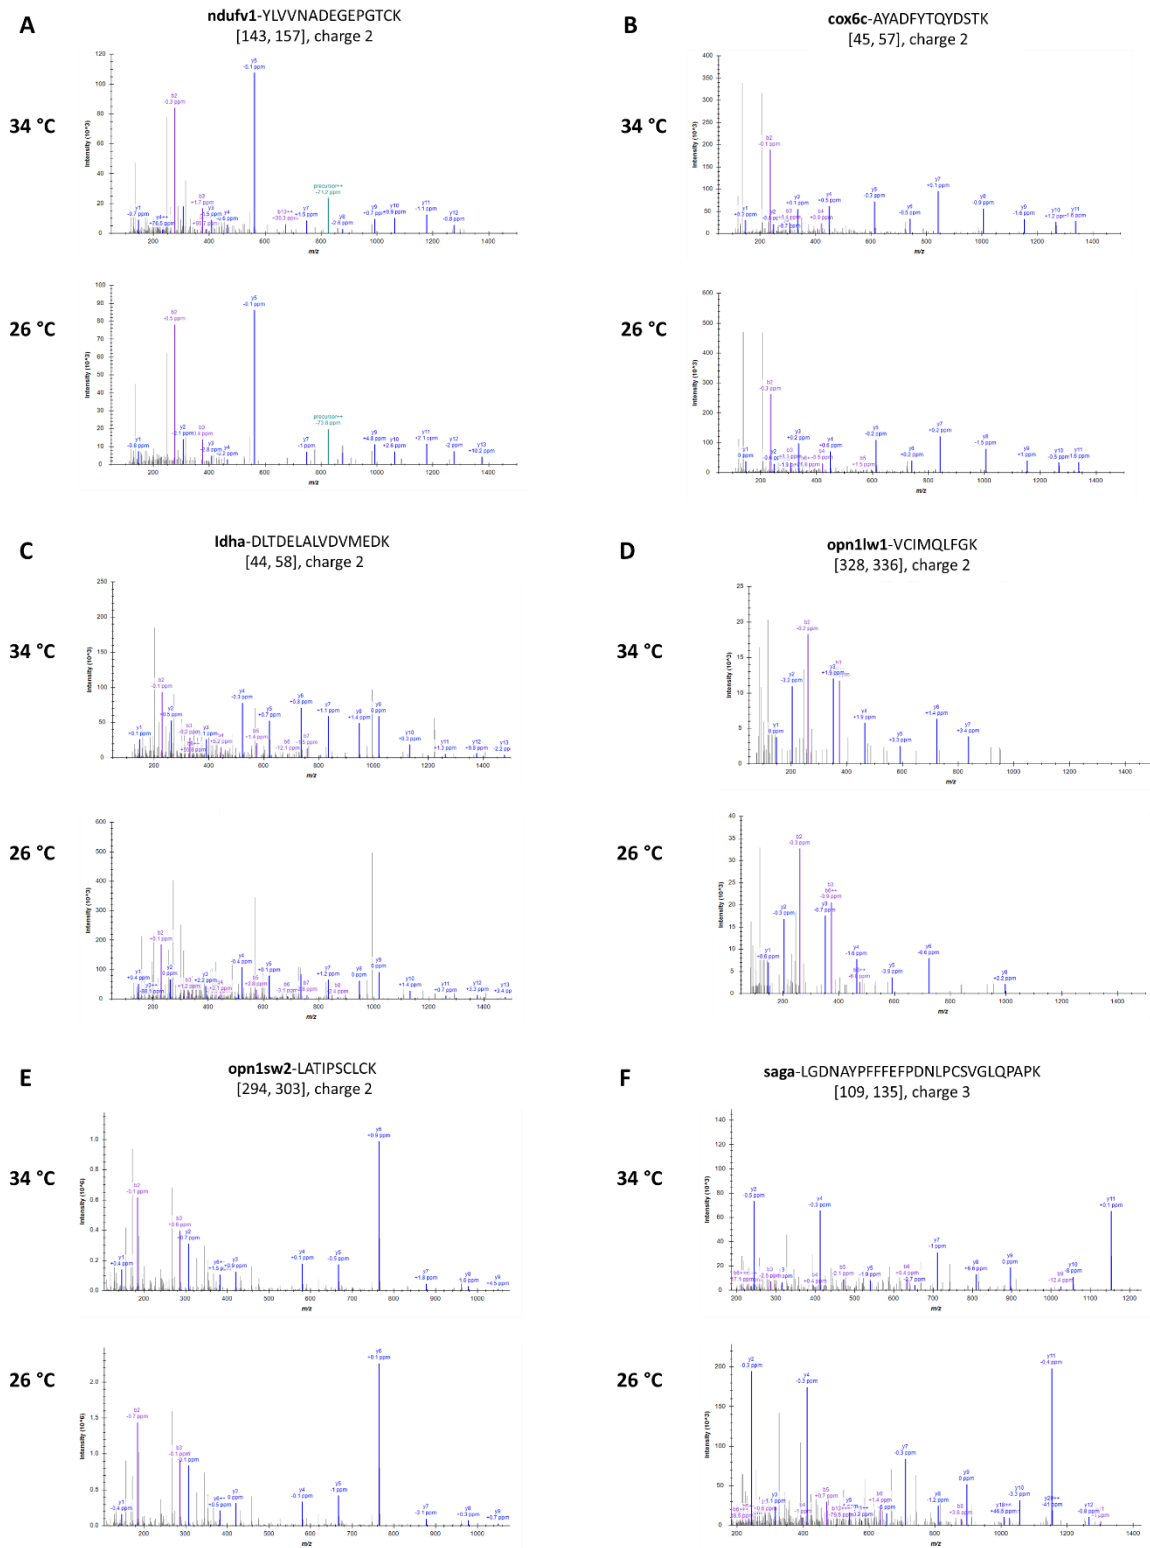

**Figure S5.** Representative MS<sup>2</sup> spectra of the transitions observed for the peptide: A) 143-YLVVNADEGEPTGK-157 from NADH dehydrogenase [ubiquinone] flavoprotein 1 (ndufv1); B) 45-AYADFYTQYDSTK-57 from Cytochrome c oxidase subunit 6C (cox6c); C) 44-DLTDELALVDVMDK-58 from L-lactate dehydrogenase A chain (ldha); D) 328-VcIMQLFGK-336 from Long-wavelength-sensitive-1 cone opsin (opn1lw1); E) 294-LATIPSLCK-303 from Opsin 1 (Cone pigments), short-wave-sensitive 2 (opn1sw2) and F) 109-LGDNAYPFFFEFPDNLPCSVGLQPAPK-135 from S-arrestin (saga) in the 34 °C vs 26 °C comparison.

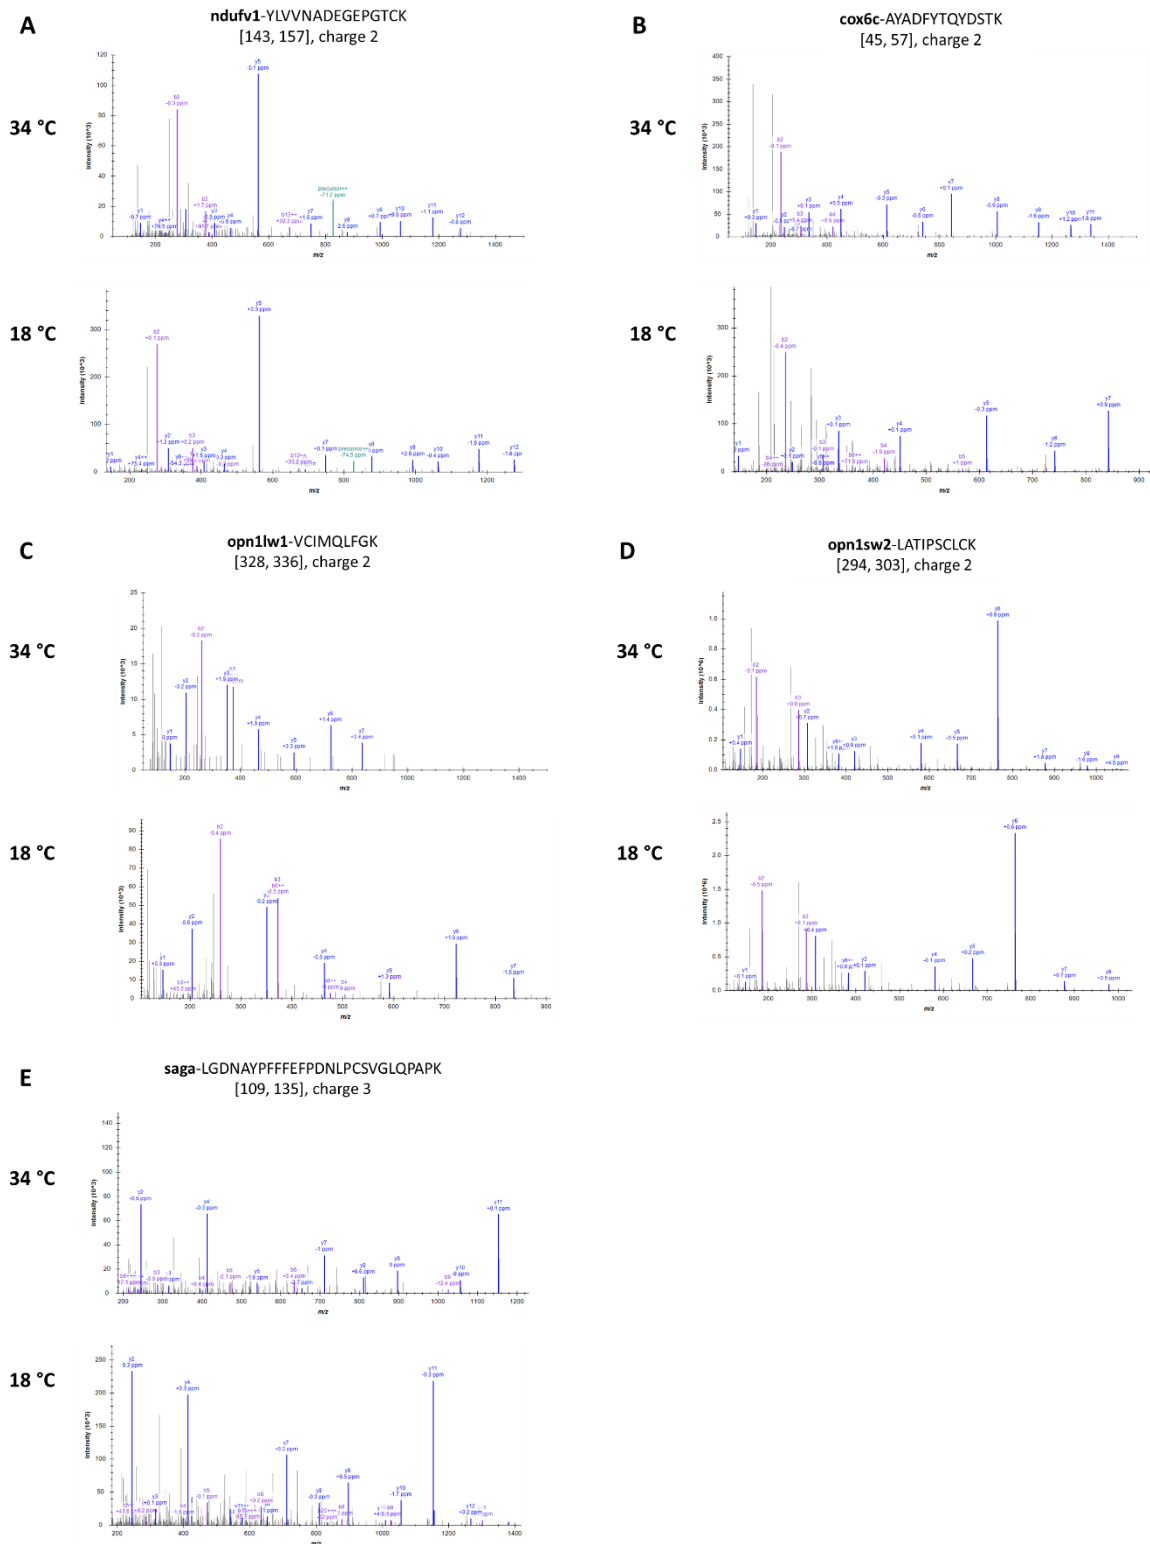

**Figure S6.** Representative MS<sup>2</sup> spectra of the transitions observed for the peptide: A) 143-YLVVNADEGEPTcK-157 from NADH dehydrogenase [ubiquinone] flavoprotein 1 (*ndufv1*); B) 45-AYADFYTYQDYSTK-57 from Cytochrome c oxidase subunit 6C (*cox6c*); C) 328-VcIMQLFGK-336 from Long-wavelength-sensitive-1 cone opsin (*opn1lw1*); D) 294-LATIPScLcK-303 from Opsin 1 (Cone pigments), short-wave-sensitive 2 (*opn1sw2*) and E) 109 LGDNAYPFFFEFPDNLPCSVGLQPAK-135 from S-arrestin (*saga*) in the 34 °C vs 18 °C comparison.
